# Supplementary material for: Overexpression of KMT9α Is Associated with Aggressive Basal-like Muscle-Invasive Bladder Cancer
Source: MDPI journal article supplement (doi:10.3390/cells12040589), 2023-02-11
Supplement: s1 [file s1]

# Overexpression of KMT9 $\alpha$ is associated with aggressive basal-like muscle-invasive bladder cancer

Figure S1

A

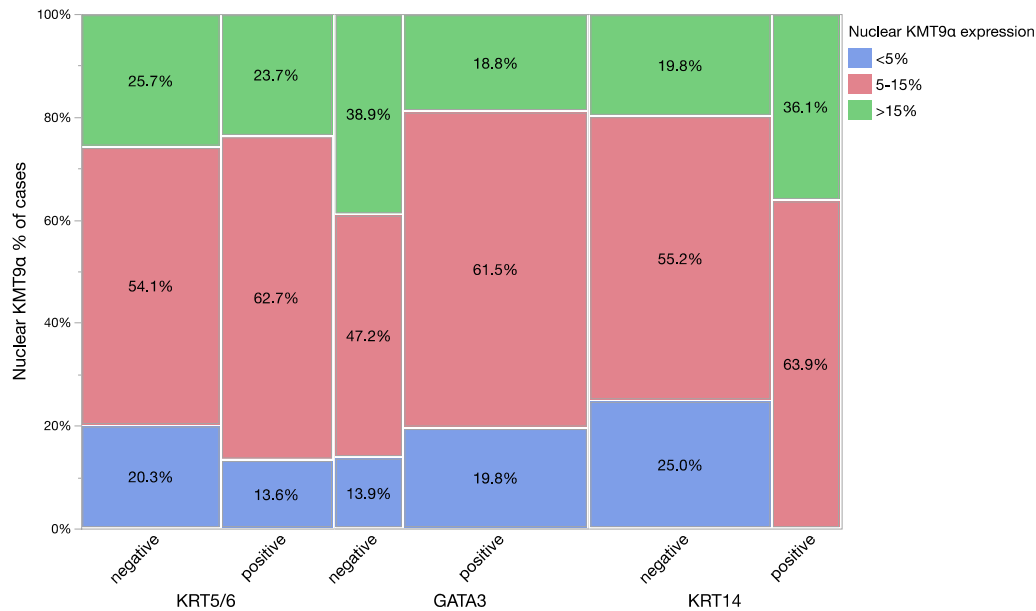

B

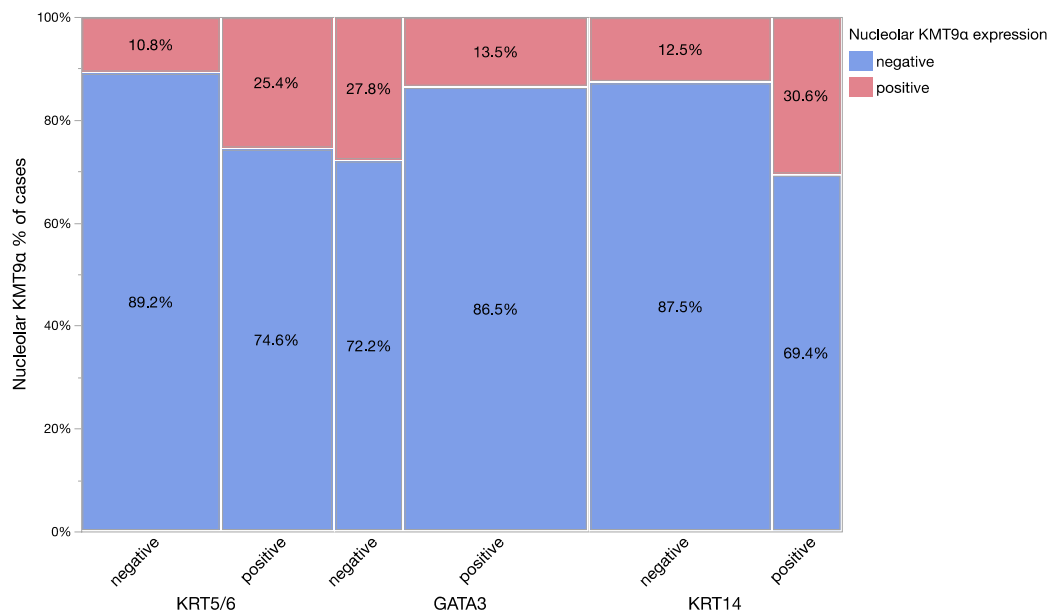

**Figure S1:** Correlation between nuclear (A) and nucleolar (B) KMT $\alpha$  expressing tumors and IHC of KRT5/6 (n=133), GATA3 (n=132) and KRT14 (n=132).

**Figure S2**

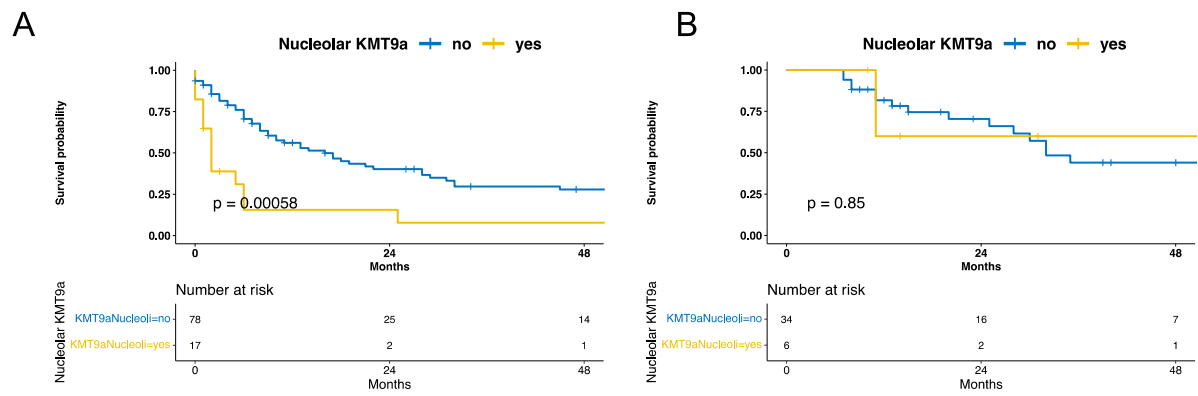

**Figure S2:** Kaplan-Meier curve for overall survival for patients with cystectomy only (A) and patients receiving adjuvant chemotherapy (B) stratified for nucleolar KMT9 $\alpha$  expression.

Figure S3

KMT9 $\alpha$

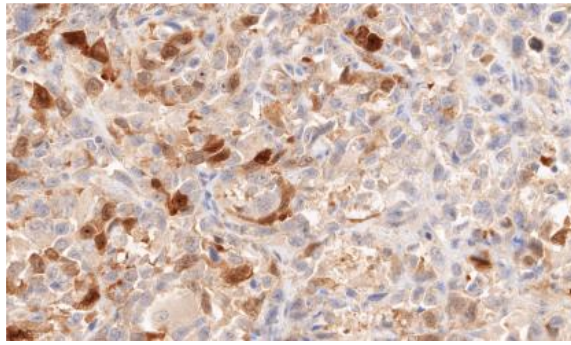

p53

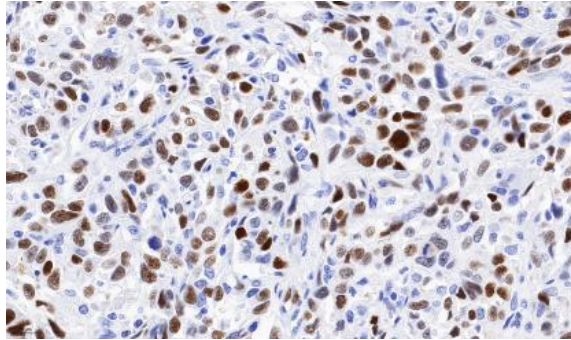

GATA3

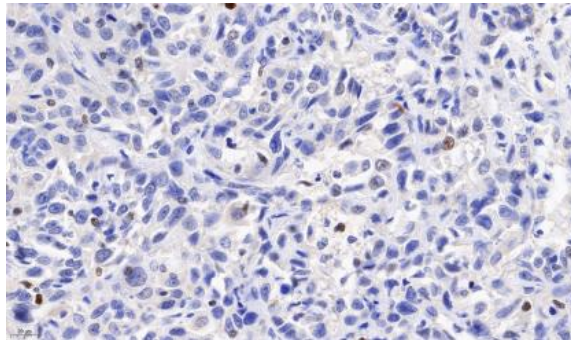

KRT5/6

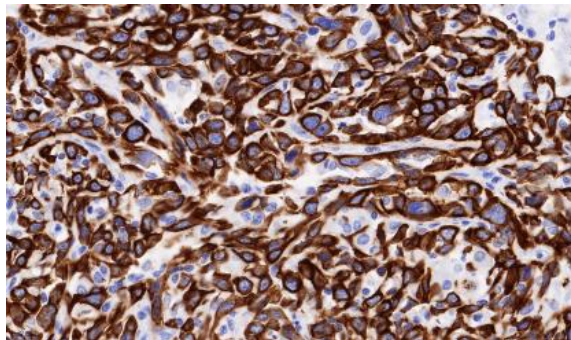

KRT14

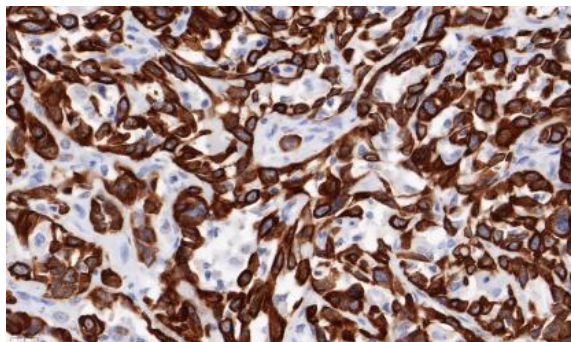

**Figure S3:** IHC for KMT9 $\alpha$  (nuclear and nucleolar positive), p53 (overexpression), GATA3 (negative), KRT5/6 (positive) and KRT14 (positive) of one representative case; magnification 400x.

**Figure S4**

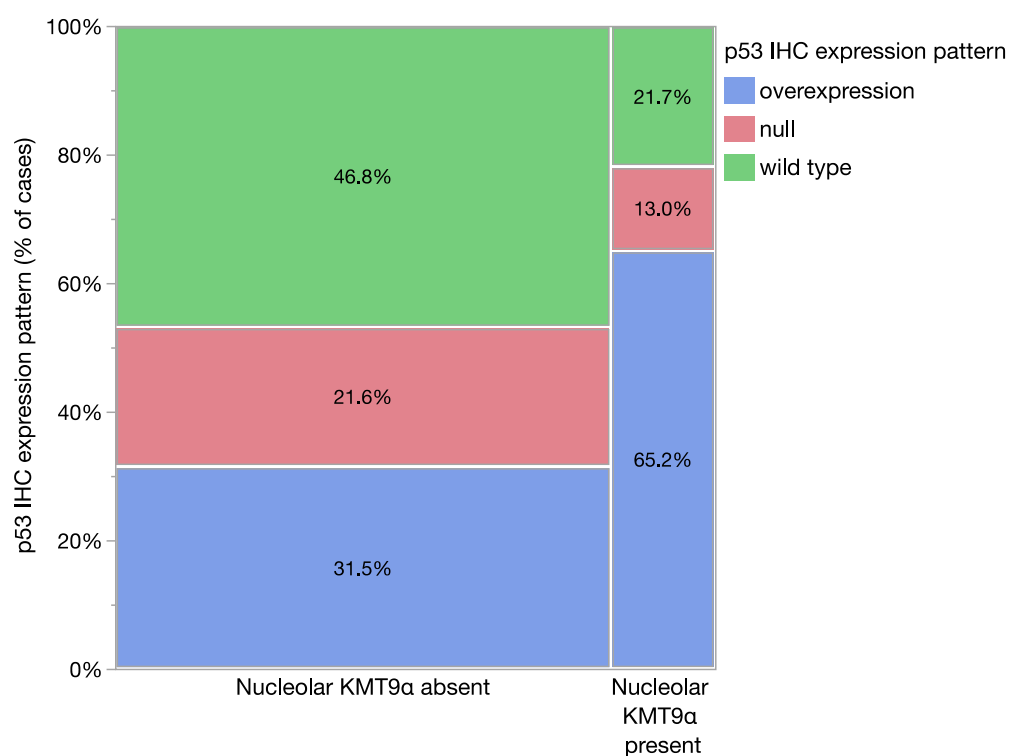

**Figure S4:** Association of nucleolar KMT9 $\alpha$  expression and p53 expression pattern. Cases with nucleolar KMT9 $\alpha$  expression showed p53 overexpression in 65% (15/23), null type in 13% (3/23) and wild type in 22% (5/23) of cases, respectively. This was significantly more, than in cases without nucleolar KMT9 $\alpha$  expression (n=111),  $p<0.01$ .

**Figure S5**

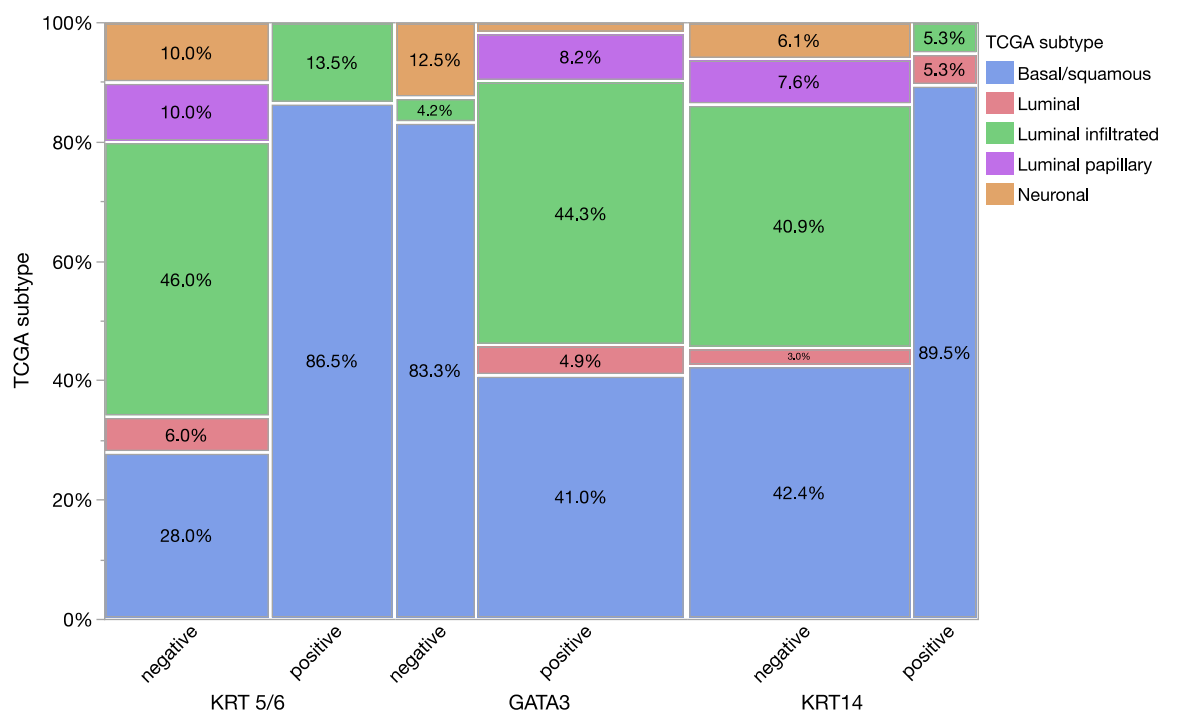

**Figure S5:** Association of molecular subtypes with IHC-expression of KRT5/6 ( $p<0.0001$ ), GATA3 ( $p=0.0002$ ) and KRT14 ( $p=0.006$ ).

**Figure S6**

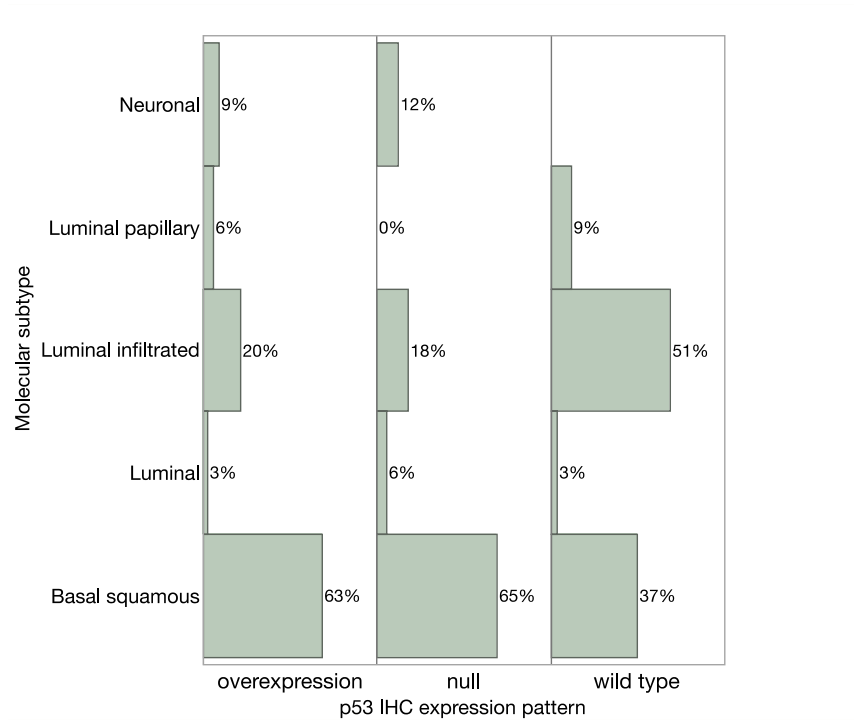

**Figure S6:** Association of molecular subtypes with p53 IHC expression patterns ( $\text{Chi}^2$   $p=0.06$ ). The p53 expression was scored according to the percentage of clear nuclear positive tumor cells (0% = null type, 1–50% = wild type, and >50% = overexpression)
